# Supplementary material for: Characteristics of Biogas Production Activity and Microbial Community during Sub-Moderate Temperature Anaerobic Digestion of Wastewater
Source: MDPI journal article supplement (doi:10.3390/fermentation9100903), 2023-10-10
Supplement: s1 [file s1]

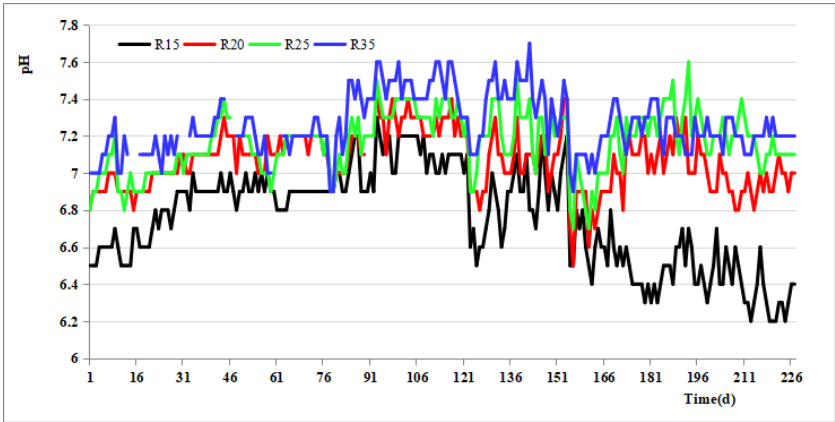

Figure S1. The change of pH along with the promotion of OLR.

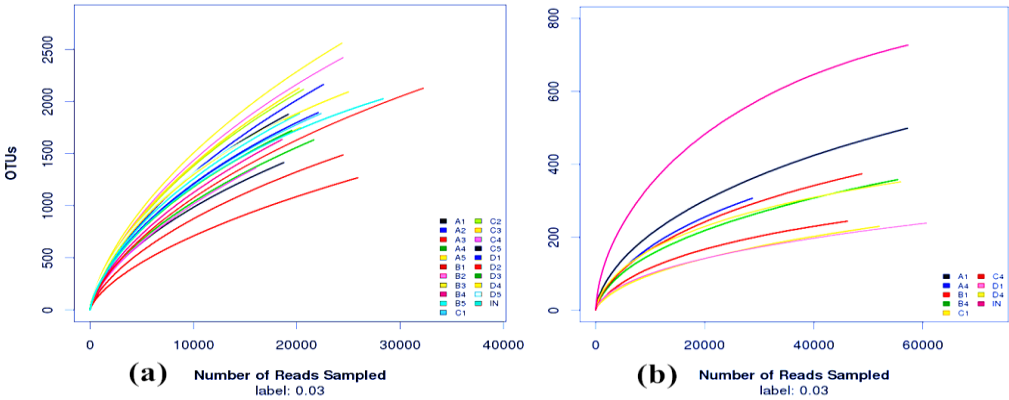

Figure S2. Rarefaction analysis of 16S rDNA OTUs at different taxonomic resolutions, (a): Bacterial community; (b): Archaeal community. The letter A, B, C and D symbolize 15°C, 20°C, 25°C and 35°C, respectively; the number 1, 2, 3,4 and 5 represent OLR, 3.30, 8.25, 13.2, 18.15 and 23.10 kg(COD)/m<sup>3</sup>·d, respectively.

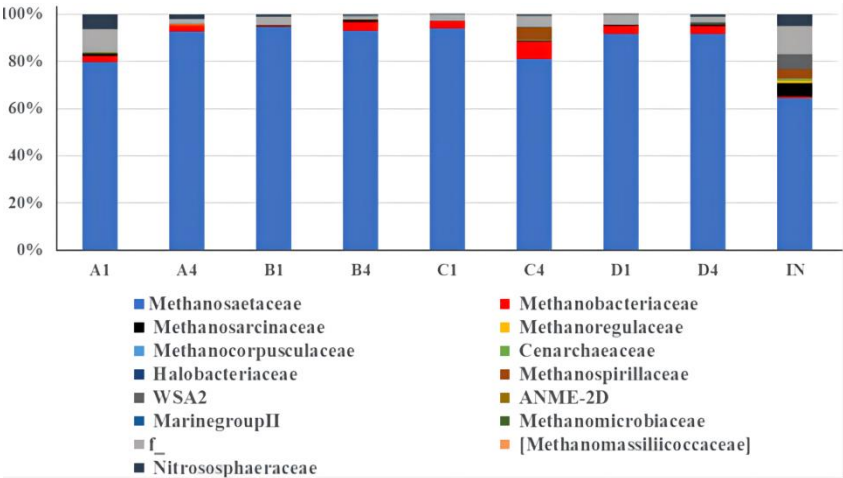

Figure S3. Composition of archaeal community under different OLR on (a) the family level in R15, R20, R25, and R35, respectively. The letter A, B, C and D symbolize 15°C, 20°C, 25°C and 35°C, respectively; the number 1, 2, 3,4 and 5 represent OLR, 3.30, 8.25, 13.2, 18.15 and 23.10 kg(COD)/m<sup>3</sup>·d, respectively.
